# Supplementary material for: Investigating the oxidation mechanism of facet-dependent pyrite: implications for the environment and sulfur evolution
Source: Royal Society of Chemistry journal article supplement (doi:10.1039/d3em00221g), 2023-01-01
Supplement: d3em00221g1.pdf [file d3em00221g1.pdf]

## Supporting Information

### **Investigating the oxidation mechanism of facet-dependent pyrite: implications for the environment and sulfur evolution**

Chenrui Liu, Yun Liu\*, Shuai Zeng, Dejian Li

Department of Environmental Science and Engineering, College of Environment and Resources, Xiangtan University, Xiangtan 411105, China

\*Corresponding author.

Fax: +86 731 58292231

Tel: +86 731 58292231

E-mail: liuyunscut@163.com

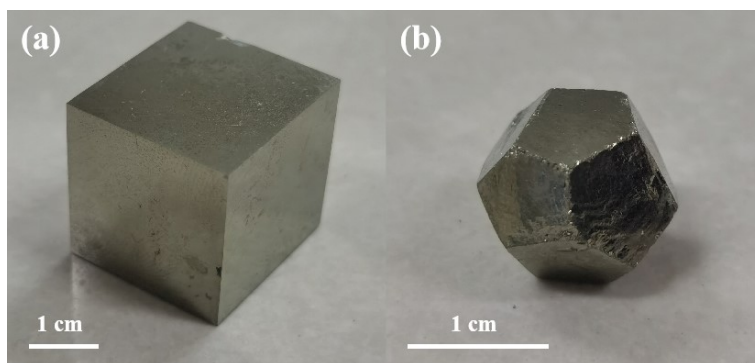

**Fig. S1** single crystals of FeS<sub>2</sub>(100) and FeS<sub>2</sub>(210)

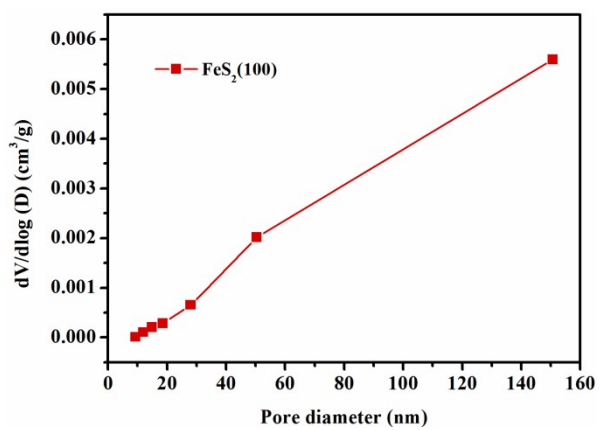

**Fig. S2** The pore size distributions of FeS<sub>2</sub>(100)

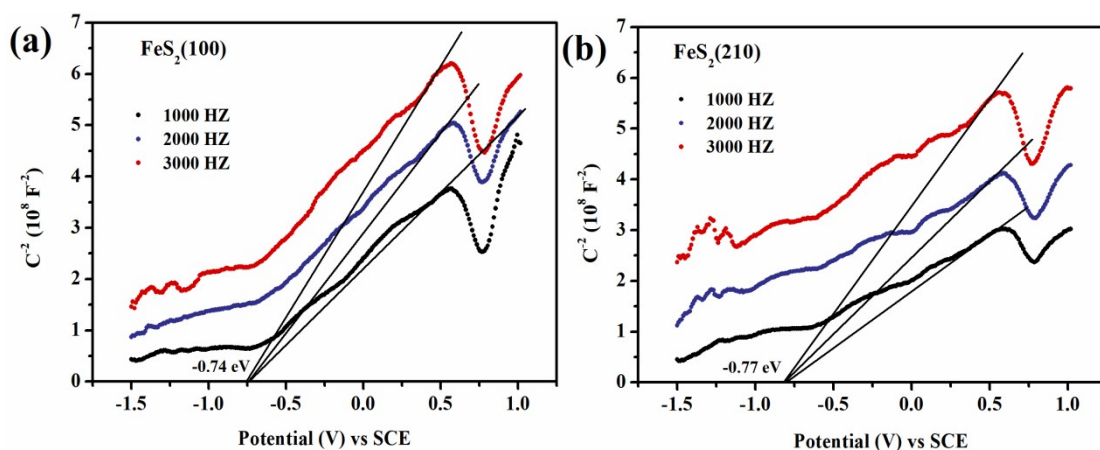

**Fig. S3** (a-b) The Mott-Schottky plots of FeS<sub>2</sub>(100) and FeS<sub>2</sub>(210) at different frequency ranges.

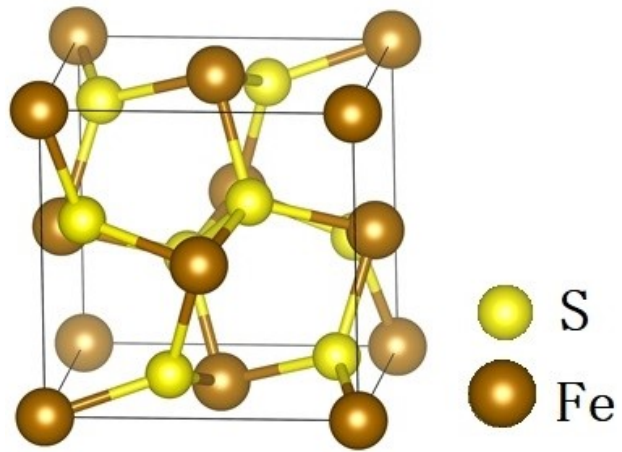

**Fig. S4** Bulk structure of pyrite

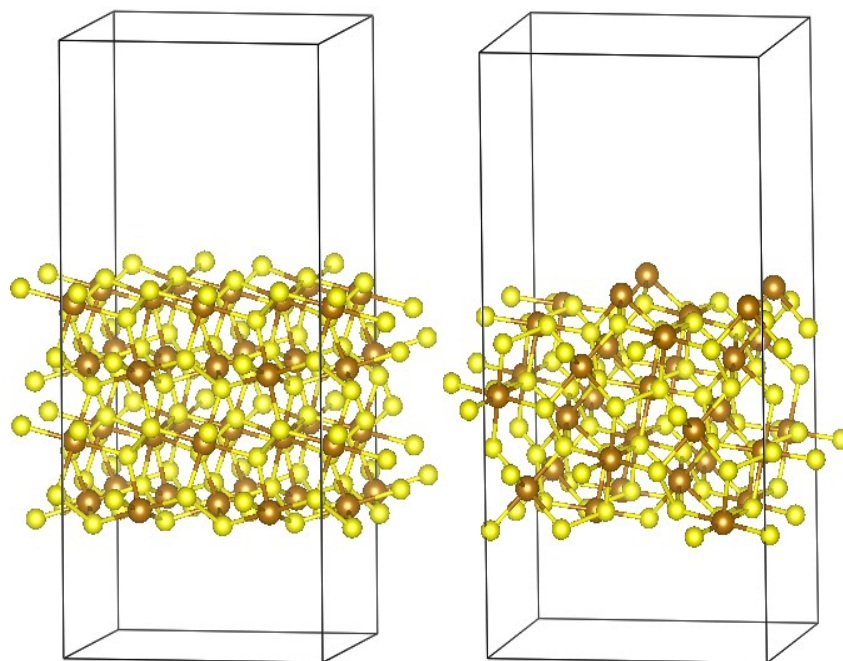

**Fig. S5** Structure of pyrite with FeS<sub>2</sub>(100) and FeS<sub>2</sub>(210) facets

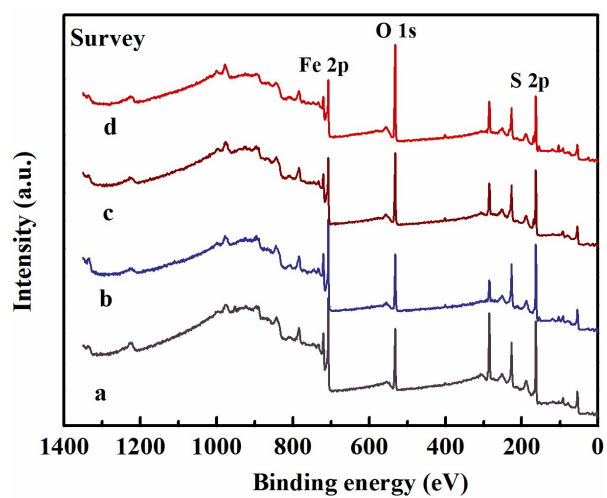

**Fig. S6** XPS spectra of (a) FeS<sub>2</sub>(100) before oxidation; (b) FeS<sub>2</sub>(210) before oxidation; (c) FeS<sub>2</sub>(100) after oxidation; (d) FeS<sub>2</sub>(210) after oxidation.

**Table. S1** The Outlier Detection Method for each element in FeS<sub>2</sub>(100)  
and FeS<sub>2</sub>(210)

| Elements | FeS <sub>2</sub> (100) |           |           | FeS <sub>2</sub> (210) |           |           |
|----------|------------------------|-----------|-----------|------------------------|-----------|-----------|
|          | <i>PI</i>              | <i>P2</i> | <i>P3</i> | <i>PI</i>              | <i>P2</i> | <i>P3</i> |
| Na       | 0.299                  | 1.047     | 1.347     | /                      | /         | /         |
| Mg       | 0.579                  | 0.828     | 1.407     | 1                      | -1        | /         |
| Al       | 1.400                  | 0.528     | 0.872     | 1.412                  | 0.779     | 0.632     |
| Si       | 1.402                  | 0.543     | 0.859     | 1.406                  | 0.838     | 0.568     |
| P        | 1.336                  | 0.267     | 1.069     | /                      | /         | /         |
| S        | 1.364                  | 0.358     | 1.005     | 1.214                  | 1.235     | 0.020     |
| Cl       | /                      | /         | /         | /                      | /         | /         |
| K        | 1.298                  | 0.162     | 1.135     | 1.191                  | 1.256     | 0.064     |
| Ca       | 0.8167                 | 1.408     | 0.594     | 1.406                  | 0.575     | 0.831     |
| Ti       | 0.405                  | 1.377     | 0.971     | 1                      | 1         | /         |
| Cr       | 0.097                  | 1.174564  | 1.269     | 1.225                  | 0         | 1.225     |
| Mn       | 1.412                  | 0.767     | 0.646     | 0.683                  | 1.414     | 0.731     |
| Fe       | 1.372                  | 0.984     | 0.387     | 1.117                  | 0.192     | 1.309     |
| Ni       | 0.843                  | 1.405     | 0.562     | /                      | /         | /         |
| Zr       | 1.225                  | 1.225     | 0         | /                      | /         | /         |
| W        | /                      | /         | /         | /                      | /         | /         |

**Table. S2** Properties of FeS<sub>2</sub>(100) and FeS<sub>2</sub>(210)

| Samples                | SSA (m <sup>2</sup> /g) |
|------------------------|-------------------------|
| FeS <sub>2</sub> (100) | 0.265                   |
| FeS <sub>2</sub> (210) | 0.121                   |

**Table. S3** Surface energies and coordinated numbers of FeS<sub>2</sub>(100) and FeS<sub>2</sub>(210) facets

| Facet | Surface Fe coordination | Surface S coordination | Surface energy (J/m <sup>2</sup> ) |         |
|-------|-------------------------|------------------------|------------------------------------|---------|
|       |                         |                        | Unrelaxed                          | Relaxed |
| (100) | 5                       | 2,3                    | 1.08                               | 0.88    |
| (210) | 4,5                     | 2,3                    | 1.37                               | 1.27    |

**Table. S4** The adsorption energies of different O<sub>2</sub> adsorption sites on FeS<sub>2</sub>(100) and FeS<sub>2</sub>(210) facets

| Crystal facets         | FeS <sub>2</sub> (100)           |                                 |                                 |                                 |                                 |                                |
|------------------------|----------------------------------|---------------------------------|---------------------------------|---------------------------------|---------------------------------|--------------------------------|
| Adsorption Sites       | Fe <sub>5</sub> -Fe <sub>5</sub> | Fe <sub>5</sub> -S <sub>3</sub> | Fe <sub>5</sub> -S <sub>2</sub> | S <sub>2</sub> -S <sub>3</sub>  |                                 |                                |
| Adsorption Energy (eV) | -0.7962                          | 0.85594                         | 0.5348                          | 4.3934                          |                                 |                                |
| Crystal facets         | FeS <sub>2</sub> (210)           |                                 |                                 |                                 |                                 |                                |
| Adsorption Sites       | Fe <sub>5</sub> -Fe <sub>4</sub> | Fe <sub>5</sub> -S <sub>3</sub> | Fe <sub>5</sub> -S <sub>2</sub> | Fe <sub>4</sub> -S <sub>3</sub> | Fe <sub>4</sub> -S <sub>2</sub> | S <sub>2</sub> -S <sub>3</sub> |
| Adsorption Energy (eV) | -3.865                           | 1.1602                          | -2.06                           | 2.614                           | -2.217                          | -1.022                         |

**Table. S5** The composition of Fe, S, and O elements of FeS<sub>2</sub> before and after reaction

|                 | Sample                 | Element (%) |       |       |
|-----------------|------------------------|-------------|-------|-------|
|                 |                        | Fe          | S     | O     |
| Before reaction | FeS <sub>2</sub> (100) | 17.51       | 48.53 | 33.96 |
|                 | FeS <sub>2</sub> (210) | 14.55       | 47.97 | 37.48 |
| After reaction  | FeS <sub>2</sub> (100) | 14.39       | 46.22 | 39.39 |
|                 | FeS <sub>2</sub> (210) | 11.68       | 44.65 | 43.67 |



**Table. S6** The composition of Fe, S, and O elements of FeS<sub>2</sub> before and after reaction

| Species                       | Before reaction        |                        | After reaction         |                        | FWHM | L-G |
|-------------------------------|------------------------|------------------------|------------------------|------------------------|------|-----|
|                               | FeS <sub>2</sub> (100) | FeS <sub>2</sub> (210) | FeS <sub>2</sub> (100) | FeS <sub>2</sub> (210) |      |     |
| Fe(II)                        | 0.726                  | 0.721                  | 0.696                  | 0.582                  | 0.9  | 0.8 |
| Fe(III)                       | 0.216                  | 0.219                  | 0.221                  | 0.305                  | 2.2  | 0.8 |
| Fe(hydro)oxides               | 0.058                  | 0.060                  | 0.083                  | 0.113                  | 2.2  | 0.8 |
| S <sub>2</sub> <sup>2-</sup>  | 0.773                  | 0.791                  | 0.738                  | 0.760                  | 0.8  | 0.8 |
| S <sup>2-</sup>               | 0.124                  | 0.093                  | 0.109                  | 0.055                  | 1.2  | 0.8 |
| S <sub>n</sub> <sup>2-</sup>  | 0.059                  | 0.078                  | 0.069                  | 0.073                  | 1.2  | 0.8 |
| SO <sub>4</sub> <sup>2-</sup> | 0.044                  | 0.038                  | 0.084                  | 0.112                  | 1.5  | 0.8 |
